# Supplementary material for: Stability andin vivosafety of gold, titanium nitride and parylene C coatings on NdFeB magnets implanted in muscles towards a new generation of myokinetic prosthetic limbs
Source: Royal Society of Chemistry journal article supplement (doi:10.1039/d0ra07989h), 2021-01-01
Supplement: d0ra07989h1.pdf [file d0ra07989h1.pdf]

## Supplementary Materials

Title:

**Stability and in vivo safety of gold, titanium nitride and parylene C coatings on NdFeB magnets implanted in muscles towards a new generation of myokinetic prosthetic limbs**

*Veronica Iacovacci<sup>a,b</sup>, Irene Naselli<sup>a</sup>, Alice Rita Salgarella<sup>a</sup>, Francesco Clemente<sup>a,b</sup>, Leonardo Ricotti<sup>a,b</sup>, and Christian Cipriani<sup>a,b</sup>*

a. The BioRobotics Institute, Scuola Superiore Sant'Anna, Piazza Martiri della Libertà 33, 56127 Pisa, Italy

b. Department of Excellence in Robotics & AI, Scuola Superiore Sant'Anna, Piazza Martiri della Libertà 33, 56127 Pisa, Italy

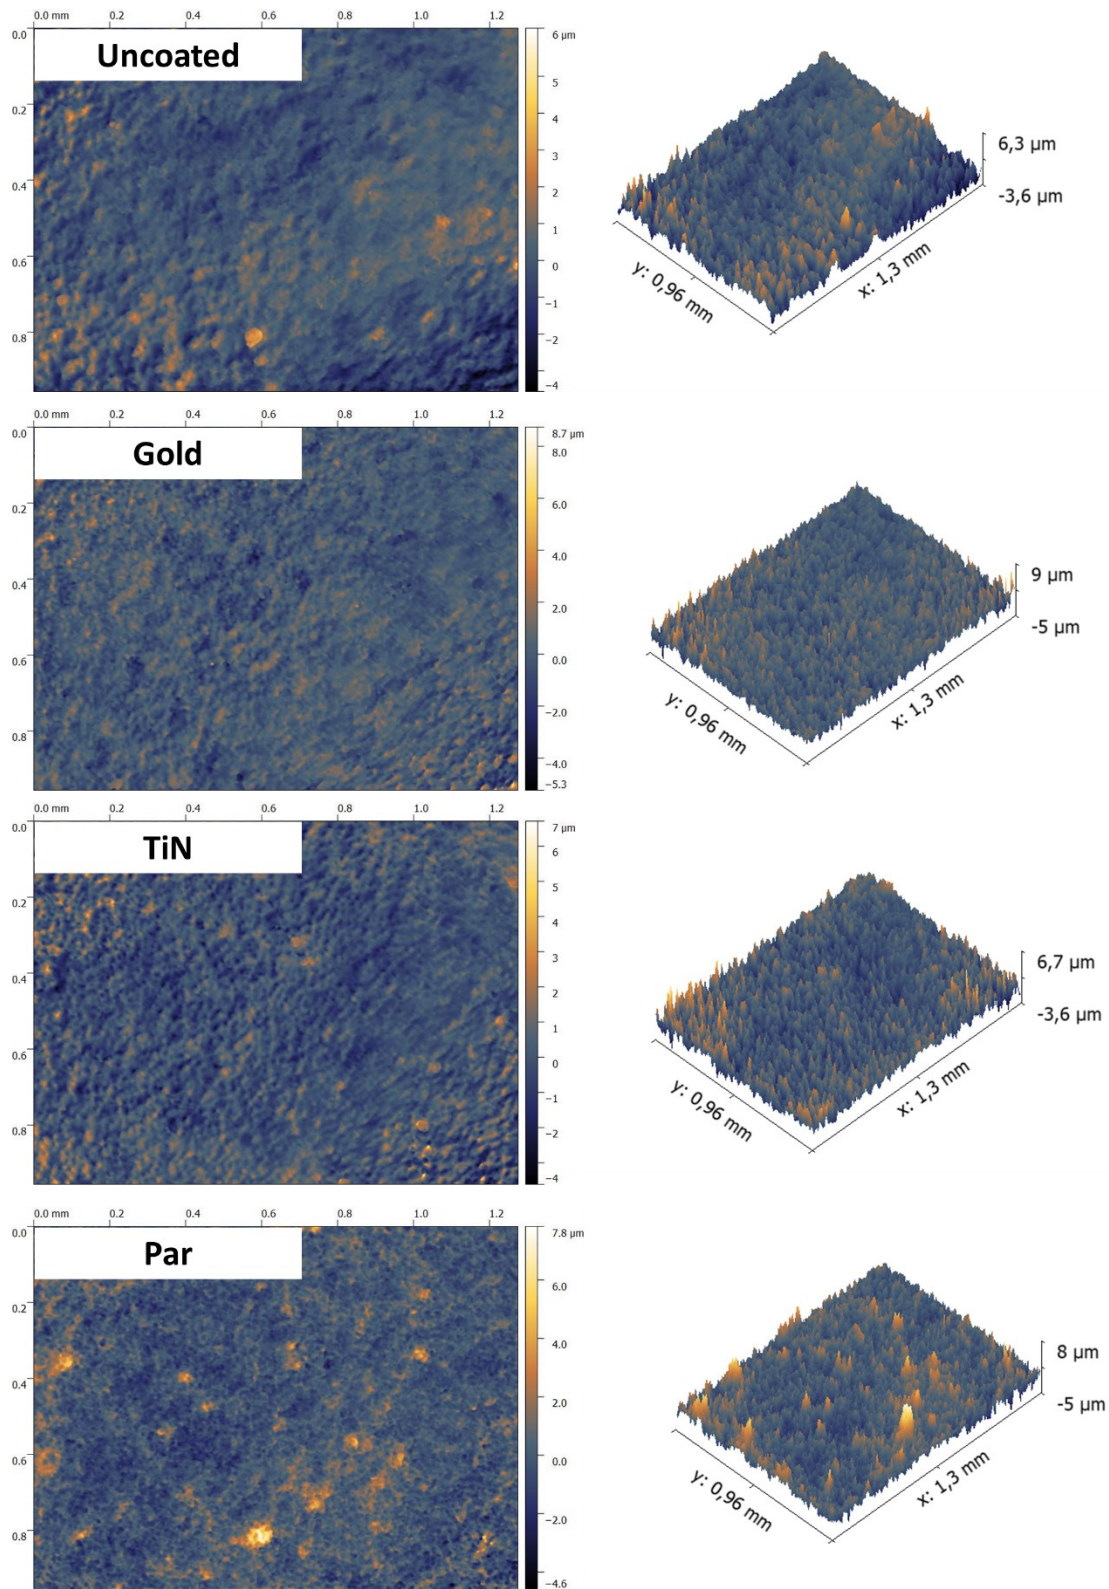

Fig. S 1: Surface characterization through optical profilometer of Uncoated and coated magnets (Gold, TiN, Par). Both 2D and 3D surface scans are reported for each material. Optical profilometer analysis (DCM 3D, Leica, Germany), relying on the combination of confocal microscopy and interferometry techniques, was used to quantitatively assess surface roughness. Samples with different coatings were scanned (1.27 x 0.95 mm<sup>2</sup> scanned area, three samples per coating type and three images in different locations for each sample) and three dimensional surface profiles were acquired and processed through the Gwyddion software.

Table S 1: Roughness parameters derived from optical profilometer analysis. Ra is the arithmetic average height; Rq is the root mean square error roughness; Rsk is the skewness; Rp is the maximum height of peak; Rv is the maximum depth of valleys.

|                 | <b>Ra [<math>\mu\text{m}</math>]</b> | <b>Rq [<math>\mu\text{m}</math>]</b> | <b>Rsk</b> | <b>Rp [<math>\mu\text{m}</math>]</b> | <b>Rv [<math>\mu\text{m}</math>]</b> |
|-----------------|--------------------------------------|--------------------------------------|------------|--------------------------------------|--------------------------------------|
| <b>Uncoated</b> | 0.52±0.08                            | 0.69±0.11                            | 0.06±0.43  | 5.34±0.77                            | -3.65±1.43                           |
| <b>Gold</b>     | 0.64±0.03                            | 0.83±0.04                            | 0.03±0.16  | 8.93±3.45                            | -5.07±0.88                           |
| <b>TiN</b>      | 0.60±0.03                            | 0.79±0.03                            | 0.45±0.11  | 7.28±1.67                            | -3.90±1.18                           |
| <b>Par</b>      | 0.74±0.09                            | 0.99±0.11                            | 0.85±0.39  | 6.87±1.29                            | -4.91±1.01                           |

Table S2: Clinical signs of toxicity and mortality record in acute systemic toxicity studies (N stands for Normal).

| Group, sex and group description        | Animal No. | Clinical signs of Toxicity/Mortality |     |     |     |     |   |   |
|-----------------------------------------|------------|--------------------------------------|-----|-----|-----|-----|---|---|
|                                         |            | Observation on Day 1                 |     |     |     | Day |   |   |
|                                         |            | 30 min                               | 1 h | 2 h | 4 h | 2   | 3 | 4 |
| G1, Female, Polar solvent control       | 1          | N                                    | N   | N   | N   | N   | N | N |
|                                         | 2          | N                                    | N   | N   | N   | N   | N | N |
|                                         | 3          | N                                    | N   | N   | N   | N   | N | N |
|                                         | 4          | N                                    | N   | N   | N   | N   | N | N |
| G2, Female, Polar Test Item extract     | 5          | N                                    | N   | N   | N   | N   | N | N |
|                                         | 6          | N                                    | N   | N   | N   | N   | N | N |
|                                         | 7          | N                                    | N   | N   | N   | N   | N | N |
|                                         | 8          | N                                    | N   | N   | N   | N   | N | N |
| G3, Female, Non-Polar solvent control   | 9          | N                                    | N   | N   | N   | N   | N | N |
|                                         | 10         | N                                    | N   | N   | N   | N   | N | N |
|                                         | 11         | N                                    | N   | N   | N   | N   | N | N |
|                                         | 12         | N                                    | N   | N   | N   | N   | N | N |
| G4, Female, Non-Polar Test Item extract | 13         | N                                    | N   | N   | N   | N   | N | N |
|                                         | 14         | N                                    | N   | N   | N   | N   | N | N |
|                                         | 15         | N                                    | N   | N   | N   | N   | N | N |
|                                         | 16         | N                                    | N   | N   | N   | N   | N | N |

Table S3: Administered extract dose and body weight changes in acute systemic toxicity studies.

| Group, sex and | Animal | Administered | Body weight (g) on Days | Percentage of weight change |
|----------------|--------|--------------|-------------------------|-----------------------------|
|----------------|--------|--------------|-------------------------|-----------------------------|

| group description                       | No          | Dose (mL) | with respect to Day |              |              |              |              |              |              |
|-----------------------------------------|-------------|-----------|---------------------|--------------|--------------|--------------|--------------|--------------|--------------|
|                                         |             |           | 1                   | 2            | 3            | 4            | 1-2          | 1-3          | 1-4          |
| G1, Female, Polar solvent control       | 1           | 1.2       | 23.14               | 23.25        | 23.37        | 23.49        | 0.48%        | 0.99%        | 1.51%        |
|                                         | 2           | 1.2       | 23.73               | 23.85        | 23.98        | 24.09        | 0.51%        | 1.05%        | 1.52%        |
|                                         | 3           | 1.2       | 24.01               | 24.12        | 24.25        | 24.37        | 0.46%        | 1.00%        | 1.50%        |
|                                         | 4           | 1.2       | 24.63               | 24.75        | 24.86        | 24.98        | 0.49%        | 0.93%        | 1.42%        |
|                                         | 5           | 1.2       | 24.82               | 24.93        | 25.04        | 25.17        | 0.44%        | 0.89%        | 1.41%        |
|                                         | <b>Mean</b> |           | <b>24.07</b>        | <b>24.18</b> | <b>24.30</b> | <b>24.42</b> | <b>0.47%</b> | <b>0.97%</b> | <b>1.47%</b> |
|                                         | <b>±SD</b>  |           | <b>0.68</b>         | <b>0.68</b>  | <b>0.68</b>  | <b>0.68</b>  | <b>0.02%</b> | <b>0.06%</b> | <b>0.05%</b> |
| G2, Female, Polar Test Item extract     | 6           | 1.2       | 23.24               | 23.36        | 23.47        | 23.59        | 0.52%        | 0.99%        | 1.51%        |
|                                         | 7           | 1.2       | 23.41               | 23.53        | 23.65        | 23.77        | 0.51%        | 1.03%        | 1.54%        |
|                                         | 8           | 1.2       | 24.10               | 24.22        | 24.35        | 24.48        | 0.50%        | 1.04%        | 1.58%        |
|                                         | 9           | 1.2       | 24.74               | 24.86        | 24.97        | 25.10        | 0.49%        | 0.93%        | 1.46%        |
|                                         | 10          | 1.2       | 24.82               | 24.93        | 25.05        | 25.27        | 0.44%        | 0.93%        | 1.81%        |
|                                         | <b>Mean</b> |           | <b>24.06</b>        | <b>24.18</b> | <b>24.30</b> | <b>24.44</b> | <b>0.49%</b> | <b>0.98%</b> | <b>1.58%</b> |
|                                         | <b>±SD</b>  |           | <b>0.73</b>         | <b>0.73</b>  | <b>0.73</b>  | <b>0.76</b>  | <b>0.03%</b> | <b>0.05%</b> | <b>0.14%</b> |
| G3 Female, Non-Polar solvent control    | 11          | 1.2       | 23.24               | 23.35        | 23.47        | 23.59        | 0.47%        | 0.99%        | 1.51%        |
|                                         | 12          | 1.2       | 23.58               | 23.70        | 23.82        | 23.95        | 0.51%        | 1.02%        | 1.57%        |
|                                         | 13          | 1.2       | 23.86               | 23.98        | 24.11        | 24.23        | 0.50%        | 1.05%        | 1.55%        |
|                                         | 14          | 1.2       | 24.77               | 24.89        | 24.01        | 24.14        | 0.48%        | -3.07%       | 2.54%        |
|                                         | 15          | 1.2       | 24.89               | 24.96        | 25.08        | 25.19        | 0.28%        | 0.76%        | 1.21%        |
|                                         | <b>Mean</b> |           | <b>24.07</b>        | <b>24.18</b> | <b>24.10</b> | <b>24.22</b> | <b>0.45%</b> | <b>0.15%</b> | <b>1.68%</b> |
|                                         | <b>±SD</b>  |           | <b>0.73</b>         | <b>0.72</b>  | <b>0.60</b>  | <b>0.60</b>  | <b>0.10%</b> | <b>1.80%</b> | <b>0.50%</b> |
| G4, Female, Non-Polar Test Item extract | 16          | 1.2       | 23.35               | 23.45        | 23.57        | 23.69        | 0.43%        | 0.94%        | 1.46%        |
|                                         | 17          | 1.2       | 23.69               | 23.82        | 23.95        | 24.07        | 0.55%        | 1.10%        | 1.60%        |
|                                         | 18          | 1.2       | 23.99               | 24.11        | 24.19        | 24.31        | 0.50%        | 0.83%        | 1.33%        |
|                                         | 19          | 1.2       | 24.50               | 24.62        | 24.73        | 24.85        | 0.49%        | 0.94%        | 1.43%        |
|                                         | 20          | 1.2       | 24.81               | 24.93        | 25.05        | 25.17        | 0.48%        | 0.97%        | 1.45%        |
|                                         | <b>Mean</b> |           | <b>24.07</b>        | <b>24.19</b> | <b>24.30</b> | <b>24.42</b> | <b>0.49%</b> | <b>0.96%</b> | <b>1.45%</b> |
|                                         | <b>±SD</b>  |           | <b>0.59</b>         | <b>0.60</b>  | <b>0.59</b>  | <b>0.59</b>  | <b>0.04%</b> | <b>0.09%</b> | <b>0.10%</b> |

Table S4: Gross pathology findings in acute systemic toxicity studies (TS:Terminal Sacrifice, NAD: No Abnormality Detected)

| Group, sex and group description | Animal No. | Fate | Gross Pathology |
|----------------------------------|------------|------|-----------------|
|----------------------------------|------------|------|-----------------|

|                                         |    |    | External | Internal |
|-----------------------------------------|----|----|----------|----------|
| G1, Female, Polar solvent control       | 1  | TS | NAD      | NAD      |
|                                         | 2  | TS | NAD      | NAD      |
|                                         | 3  | TS | NAD      | NAD      |
|                                         | 4  | TS | NAD      | NAD      |
|                                         | 5  | TS | NAD      | NAD      |
| G2, Female, Polar Test Item extract     | 6  | TS | NAD      | NAD      |
|                                         | 7  | TS | NAD      | NAD      |
|                                         | 8  | TS | NAD      | NAD      |
|                                         | 9  | TS | NAD      | NAD      |
|                                         | 10 | TS | NAD      | NAD      |
| G3, Female, Non-Polar solvent control   | 11 | TS | NAD      | NAD      |
|                                         | 12 | TS | NAD      | NAD      |
|                                         | 13 | TS | NAD      | NAD      |
|                                         | 14 | TS | NAD      | NAD      |
|                                         | 15 | TS | NAD      | NAD      |
| G4, Female, Non-Polar Test Item extract | 16 | TS | NAD      | NAD      |
|                                         | 17 | TS | NAD      | NAD      |
|                                         | 18 | TS | NAD      | NAD      |
|                                         | 19 | TS | NAD      | NAD      |
|                                         | 20 | TS | NAD      | NAD      |

Table S5: Pyrogenicity test: temperature measurements.

|                          | Animal No. | Body weight (kg) | Dose (mL) | Temperature         |                      |        |         |         |
|--------------------------|------------|------------------|-----------|---------------------|----------------------|--------|---------|---------|
|                          |            |                  |           | Control Temperature | After administration |        |         |         |
|                          |            |                  |           |                     | 60 min               | 90 min | 120 min | 150 min |
| <b>Blank extract</b>     | 1          | 1.85             | 18.5      | 37.8                | 37.8                 | 37.9   | 38.0    | 38.0    |
|                          | 2          | 2.21             | 22.1      | 38.4                | 38.5                 | 38.5   | 38.5    | 38.0    |
|                          | 3          | 2.38             | 23.8      | 38.3                | 38.4                 | 38.7   | 38.7    | 38.0    |
| <b>Test Item extract</b> | 4          | 1.97             | 19.7      | 38.2                | 38.5                 | 38.5   | 38.5    | 38.4    |
|                          | 5          | 1.66             | 16.6      | 38.8                | 38.8                 | 38.8   | 38.7    | 38.6    |
|                          | 6          | 1.61             | 16.1      | 38.5                | 38.6                 | 38.7   | 38.7    | 38.7    |

Table S6: Individual animal hematological records.

| Group, sex and group description      | Animal No | Total leucocyte count (x 10 <sup>3</sup> cells/ $\mu$ L) | Total erythrocyte count (x 10 <sup>6</sup> cells/ $\mu$ L) | Hemoglobin (g/dL) | Hematocrit (%) | Platelet count (x 10 <sup>3</sup> cells/ $\mu$ L) | Reticulocyte count (%) | Neutrophils (%) | Lymphocytes (%) |
|---------------------------------------|-----------|----------------------------------------------------------|------------------------------------------------------------|-------------------|----------------|---------------------------------------------------|------------------------|-----------------|-----------------|
| G <sub>R</sub> 1, M, Negative Control | 1         | 8.70                                                     | 6.72                                                       | 13.5              | 41.1           | 727                                               | 1.95                   | 22.8            | 66.9            |
|                                       | 2         | 9.49                                                     | 5.36                                                       | 11.1              | 36.4           | 561                                               | 7.89                   | 22.7            | 68.5            |
|                                       | 3         | 9.16                                                     | 5.47                                                       | 114.4             | 37.2           | 531                                               | 8.11                   | 24.7            | 67.5            |
| G <sub>R</sub> 2, M, Test Item        | 4         | 8.46                                                     | 5.60                                                       | 12.0              | 38.1           | 666                                               | 3.76                   | 40.4            | 48.0            |
|                                       | 5         | 11.61                                                    | 6.04                                                       | 12.9              | 39.9           | 549                                               | 2.63                   | 56.1            | 32.1            |
|                                       | 6         | 5.73                                                     | 6.29                                                       | 13.2              | 43.1           | 549                                               | 4.58                   | 41.3            | 43.0            |
| G <sub>R</sub> 1, F, Negative Control | 7         | 12.22                                                    | 5.17                                                       | 10.6              | 34.2           | 607                                               | 4.94                   | 39.3            | 35.2            |
|                                       | 8         | 8.27                                                     | 4.89                                                       | 10.4              | 32.5           | 755                                               | 4.94                   | 37.6            | 52.5            |
|                                       | 9         | 8.83                                                     | 6.07                                                       | 13.2              | 41.8           | 494                                               | 3.91                   | 26.4            | 60.7            |
| G <sub>R</sub> 2, F, Test Item        | 10        | 17.94                                                    | 4.68                                                       | 9.4               | 32.8           | 950                                               | 3.77                   | 59.0            | 27.8            |
|                                       | 11        | 18.68                                                    | 4.65                                                       | 9.5               | 32.5           | 1008                                              | 3.48                   | 55.3            | 32.3            |
|                                       | 12        | 5.65                                                     | 5.07                                                       | 10.6              | 35.5           | 302                                               | 7.29                   | 26.3            | 49.3            |



Table S 7 Individual animal urinalysis record

| Group, sex and Group description      | Animal No | Urobilinogen (mg/dL) | Bilirubin (mg/dL) | Ketones (mg/dL) | Blood (RBC/ $\mu$ L) | Protein (mg/dL) | Nitrite | Leucocytes (LEU/ $\mu$ L) | Glucose (mg/dL) | pH  | Microalbumin (mg/dL) |
|---------------------------------------|-----------|----------------------|-------------------|-----------------|----------------------|-----------------|---------|---------------------------|-----------------|-----|----------------------|
| G <sub>R</sub> 1, M, Negative Control | R1        | 0.2                  | Neg               | Neg             | Neg                  | Neg             | Neg     | Neg                       | Neg             | 7.5 | 15                   |
|                                       | R2        | 0.2                  | Neg               | Neg             | Neg                  | Neg             | Neg     | Neg                       | Neg             | 7.0 | 15                   |
|                                       | R3        | 0.2                  | Neg               | Neg             | Neg                  | Neg             | Neg     | Neg                       | Neg             | 7.5 | 15                   |
| G <sub>R</sub> 2, M, Test Item        | R4        | 0.2                  | Neg               | Neg             | Neg                  | Neg             | Neg     | Neg                       | Neg             | 7.5 | 15                   |
|                                       | R5        | 1                    | 1                 | Neg             | Neg                  | 100             | Neg     | Neg                       | Neg             | 8.5 | >15                  |
|                                       | R6        | 0.2                  | Neg               | Neg             | Ca10                 | Neg             | Neg     | Neg                       | Neg             | 6.0 | 15                   |
| G <sub>R</sub> 1, F, Negative Control | R7        | 0.2                  | Neg               | 5               | Neg                  | Trace           | Neg     | Neg                       | Neg             | 5.5 | >15                  |
|                                       | R8        | 0.2                  | Neg               | Neg             | Neg                  | Neg             | Neg     | Neg                       | Neg             | 8.5 | 15                   |
|                                       | R9        | 1                    | Neg               | Neg             | Ca80                 | 30              | Neg     | Ca70                      | Neg             | 8.5 | >15                  |
| G <sub>R</sub> 2, F, Test Item        | R10       | 0.2                  | Neg               | Neg             | Neg                  | Neg             | Neg     | Neg                       | Neg             | 6.5 | 15                   |
|                                       | R11       | 0.2                  | Neg               | Neg             | Neg                  | Trace           | Neg     | Neg                       | Neg             | 7.0 | >15                  |
|                                       | R12       | 0.2                  | Neg               | 5               | $\geq$ Ca200         | Neg             | Neg     | Neg                       | Neg             | 8.0 | 15                   |
